# Supplementary material for: Internal carbonic anhydrase activity in the tissue of scleractinian corals is sufficient to support proposed roles in photosynthesis and calcification
Source: Oxford University Press journal article supplement (doi:10.1242/jeb.118182), 2015-01-01
Supplement: jeb118182supp.pdf [file jeb118182supp.pdf]

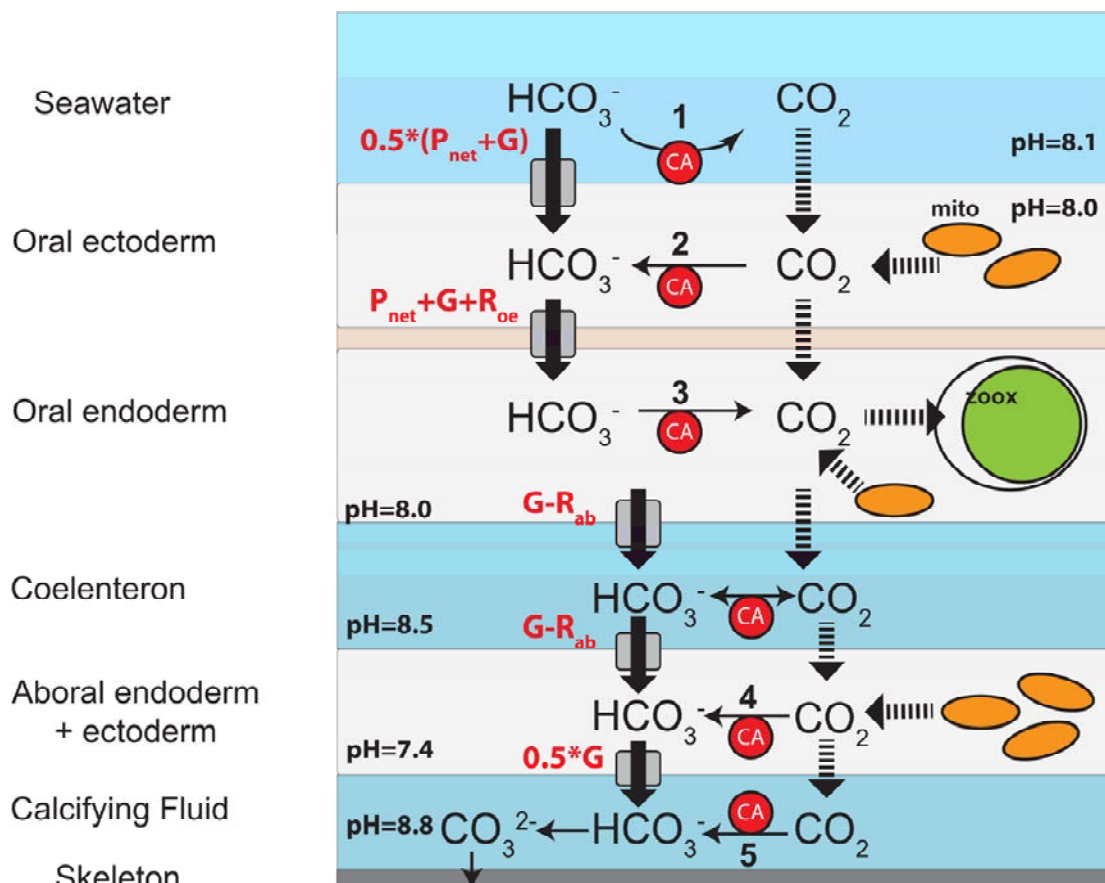

**Fig. S1. Layers and fluxes in the spatially resolved model of coral  $C_i$  processing.** The model considers active  $HCO_3^-$  fluxes (solid arrows, with specified rates in red text beside each arrow) and diffusive  $CO_2$  fluxes (dashed arrows) between tissue compartments, and the production of  $CO_2$  by mitochondrial respiration (orange ovals), consumption of  $CO_2$  by *Symbiodinium* (green circle), and loss of  $CO_3^{2-}$  through  $CaCO_3$  precipitation in the calcifying fluid.  $CO_2$  and  $HCO_3^-$  inter-conversion in each layer is catalyzed by carbonic anhydrase (red circles) and the  $CO_2/HCO_3^-$  equilibrium is affected by pH as indicated in each layer.
